# Supplementary material for: Nanoplastic at environmentally relevant concentrations activates a germline mir-240-rab-5 signaling cascade to affect the secreted ligands associated with transgenerational toxicity induction in C. elegans
Source: Royal Society of Chemistry journal article supplement (doi:10.1039/d4en00309h), 2024-01-01
Supplement: d4en00309h1.pdf [file d4en00309h1.pdf]

**Supporting Information:**

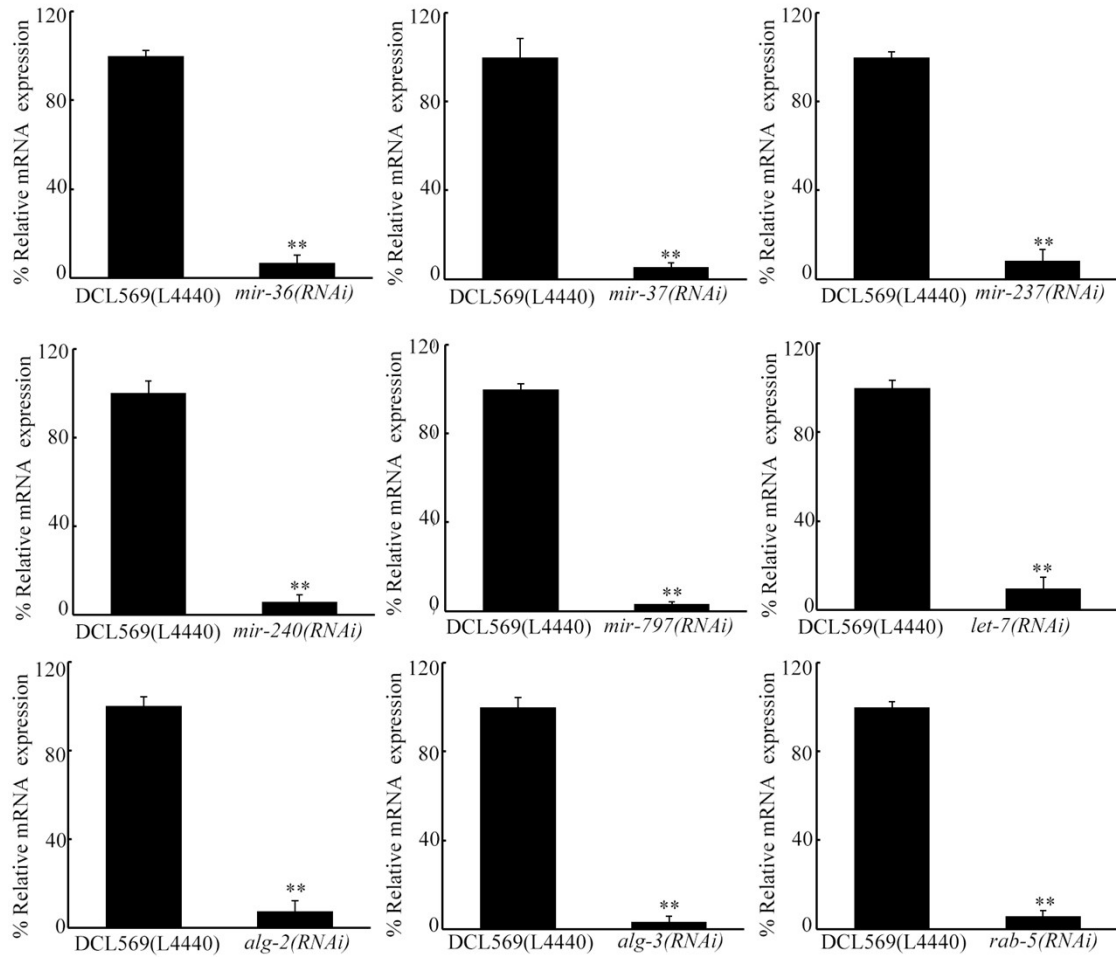

**Fig. S1.** RNAi efficiency of examined microRNAs and genes. \*\* $P < 0.01$  vs DCL569(L4440).

**Table S1.** Information for *C. elegans* strains

| Strains | Genotype                                                                                           | Description                  |
|---------|----------------------------------------------------------------------------------------------------|------------------------------|
| N2      |                                                                                                    | Wild-type                    |
| DCL569  | <i>mkcSi13[sun-1p::rde-1::sun-1</i><br><i>3'UTR + unc-119(+)]</i> ; <i>rde-</i><br><i>1(mkc36)</i> | Germline RNAi knockdown tool |

**Table S2.** Primer information for qRT-PCR

| Gene              | Forward primer (5'-3')  | Reverse primer (5'-3')   |
|-------------------|-------------------------|--------------------------|
| <i>mir-36-3p</i>  | GCGTCACCGGGTGAAAATT     | AGTGCAGGGTCCGAGGTATT     |
| <i>mir-240-3p</i> | CGTACTGGCCCCCAAATC      | AGTGCAGGGTCCGAGGTATT     |
| <i>dpy-11</i>     | AAGTATTGCCGTCCCCCAAG    | TTACGTGTCGTCGTTGCAGA     |
| <i>rab-5</i>      | TTGCGATTTCGTCAAGGGACA   | CCGCTTGAGCTCCTCGATAG     |
| <i>ain-1</i>      | ACATGCCTCGTTCGGTGAAT    | CCCCCTTGGTAGTCTTGCTG     |
| <i>sax-2</i>      | CCGAGCTGGCTTCATGTTTG    | AGCAAATTGGTGTTTTTGGAATGT |
| <i>K08D12.6</i>   | TGAAGGTGTTTGTATTCTCTCCA | CCATAAGCATTTCTCTTCACGACG |
| <i>lfe-2</i>      | CGGCCTGGCTTCTCCAAATA    | CTCAACTTGGACGGGAGCTT     |
| <i>ehs-1</i>      | ACCACCTGATCCGTTTGCAT    | AGATTTTGGAGGAGCTGGGC     |
| <i>rab-6.2</i>    | GTTTCCGCTCACTCATCCCA    | GGGTCCATCGTGACCACATT     |
| <i>set-4</i>      | GCCTGCTATCCAGCGAAGAT    | CGGGAACCATGTCACGAAGA     |
| <i>T04C9.1</i>    | ACACGATCTTTCGGAGTCGG    | TCCCGTGACGAGCAATTTCA     |
| <i>hbl-1</i>      | TCCCATAGCCCCTTACCCTC    | TGGTAACGCCCGAACATTGA     |
| <i>ins-3</i>      | TCTTATGCGTAACTGGAT      | CAGGGAGTGAATGTTATG       |
| <i>ins-39</i>     | TTGCAGCCGACGAGTTTC      | CCCGACGTGTTTGATGGT       |
| <i>daf-28</i>     | GCTCATCGCCATCTTTGC      | ACCTGGAACACGGACTGC       |
| <i>daf-2</i>      | GCTTACGCGATGAGCTGTGAT   | TCGCTGGCGACTATGTGA       |
| <i>egl-17</i>     | GGTTTAATGGAAGCGACGCC    | ATGACGAGTGCTCAAGTGGG     |
| <i>egl-15</i>     | CGGAAACGGATCAAACCTACC   | TGCGAGGCGTCATGTTCTTT     |
| <i>lin-44</i>     | ACCCTTGAGCACATTACCGA    | AGCCGATCACAATCACCTTG     |
| <i>efn-3</i>      | TTCCCGGTTGCGTTCAAAC     | CCATACCGTCAGGGATTGGG     |
| <i>lag-2</i>      | GACATCGGATGGATGGGACC    | GGCGTCTTTGACACTGCAAG     |
| <i>vab-1</i>      | ATGTGCACAGAGATCTCGCC    | CAACTCCGAACGACCAGACA     |
| <i>wrt-3</i>      | GCTTGCGGATTACTGTGGA     | AGCTGGTTTCACATCGGGAAT    |
| <i>F35C11.9</i>   | GAAGATTAGCATGAACC       | TTGGAACGCTTTATGAA        |
| <i>tba-1</i>      | TCAACACTGCCATCGCCGCC    | TCCAAGCGAGACCAGGCTTCAG   |
